# Supplementary material for: Amine-induced growth of an In2O3shell on colloidal InP nanocrystals
Source: Royal Society of Chemistry journal article supplement (doi:10.1039/b701092c), 2007-01-01
Supplement: b701092c.pdf [file b701092c.pdf]

## Amine-induced growth of an $\text{In}_2\text{O}_3$ shell on colloidal InP nanocrystals

Myriam Protière and Peter Reiss\*

### Supporting Information

In this control experiment, using the described synthesis of InP nanocrystals without addition of oleylamine, the reaction flask was opened for some seconds after injection of the P precursor.

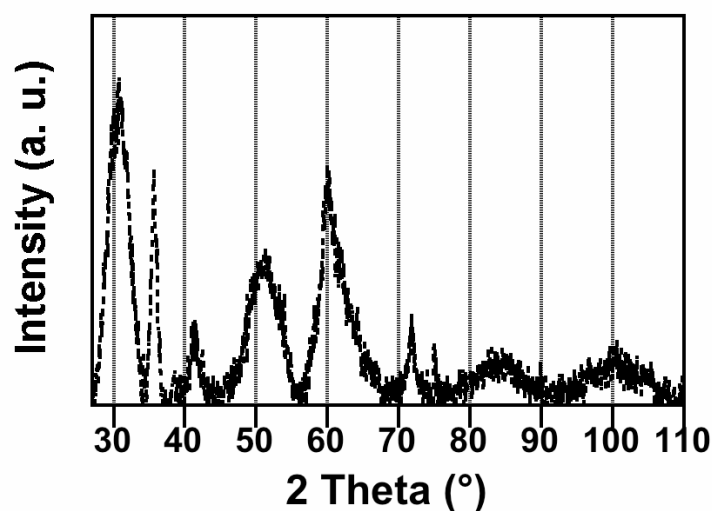

**Figure S1.** Powder X-ray diffractogram of the obtained sample.

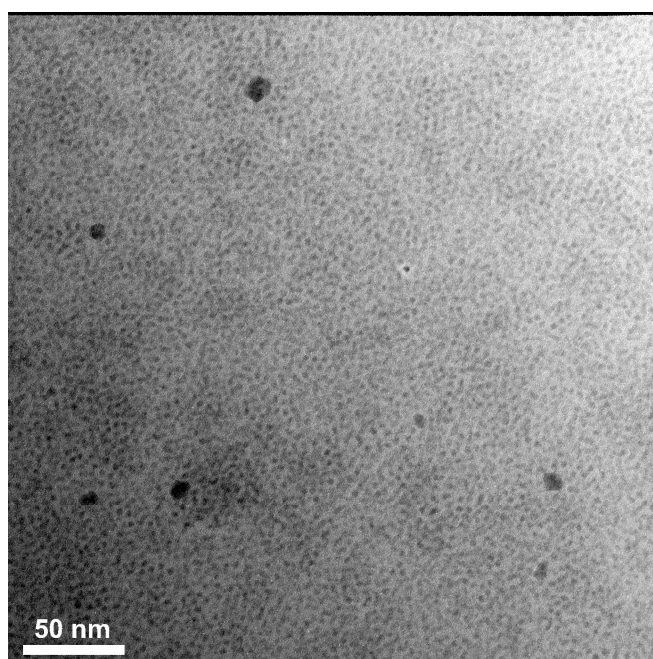

**Figure S2.** TEM micrograph of the obtained sample, exhibiting small InP as well as large-sized  $\text{In}_2\text{O}_3$  nanocrystals.
